Cite this article as: Hino H, Karasaki T, Yoshida Y, Fukami T, Sano A, Tanaka M *et al.* Risk factors for postoperative complications and long-term survival in lung cancer patients older than 80 years. *Eur J Cardiothorac Surg* 2018;53:980–6.

## Risk factors for postoperative complications and long-term survival in lung cancer patients older than 80 years<sup>†</sup>

Haruaki Hino<sup>a</sup>, Takahiro Karasaki<sup>b</sup>, Yukihiro Yoshida<sup>c</sup>, Takeshi Fukami<sup>d</sup>, Atsushi Sano<sup>e</sup>, Makoto Tanaka<sup>f</sup>,  
Yoshiaki Furuhashi<sup>g</sup>, Junji Ichinose<sup>b</sup>, Mitsuaki Kawashima<sup>b</sup> and Jun Nakajima<sup>b,\*</sup>

<sup>a</sup> Department of Thoracic Surgery, Tokyo Metropolitan Geriatric Hospital and Institute of Gerontology, Tokyo, Japan

<sup>b</sup> Department of Thoracic Surgery, The University of Tokyo Graduate School of Medicine, Tokyo, Japan

<sup>c</sup> Department of Thoracic Surgery, Asahi General Hospital, Asahi, Japan

<sup>d</sup> Department of Thoracic Surgery, National Hospital Organization Tokyo National Hospital, Kiyose, Japan

<sup>e</sup> Department of Thoracic Surgery, Chigasaki Municipal Hospital, Chigasaki, Japan

<sup>f</sup> Department of Thoracic Surgery, JR Tokyo General Hospital, Tokyo, Japan

<sup>g</sup> Department of Thoracic Surgery, Japanese Red Cross Medical Center, Tokyo, Japan

\* Corresponding author. Department of Thoracic Surgery, The University of Tokyo Graduate School of Medicine, 7-3-1 Hongo, Bunkyo-ku, Tokyo 113-8655, Japan. Tel: +81-3-38155411; fax: +81-3-56843989; e-mail: nakajima-tho@h.u-tokyo.ac.jp (J. Nakajima).

Received 7 July 2017; received in revised form 8 October 2017; accepted 13 November 2017

### Abstract

**OBJECTIVES:** The number of octogenarian lung cancer patients undergoing radical surgery has been increasing recently. However, knowledge regarding the risk factors for postoperative complications and reliable predictive factors for long-term survival is limited. This study aimed to investigate the risk factors of postoperative complications, and reliable prognostic factors, in lung cancer patients older than 80 years.

**METHODS:** Lung cancer patients aged 80 years or older who underwent radical surgery were retrospectively studied; a multi-institutional analysis was conducted from January 1998 to December 2015. Preoperative and postoperative clinical data, including age, gender, smoking history, body mass index, respiratory function, Charlson Comorbidity Index, Glasgow Prognostic Score, surgical procedure, cancer histology, clinical and pathological stage, surgical result and survival time, were collected.

**RESULTS:** A total of 337 patients, comprising 216 (64.1%) men and 121 (35.9%) women were enrolled. The median age was 82 (range 80–92) years. Of the 337 patients, 205 (60.8%) had preoperative comorbidities. Postoperative complications were observed in 119 (35.3%) patients; postoperative mortalities occurred in 6 (1.8%) patients. Univariate and multivariate analyses showed that male gender ( $P = 0.01$ ) and operation time ( $P = 0.047$ ) were associated with postoperative complications; in contrast, pathological Stage III ( $P < 0.001$ ), male gender ( $P = 0.01$ ), Charlson Comorbidity Index  $\geq 2$  ( $P = 0.03$ ) and Glasgow Prognostic Score = 1/2 ( $P = 0.04$ ) were independent prognostic factors for overall survival.

**CONCLUSIONS:** The risk factors for postoperative complications (male gender and operation time) and the predictive factors affecting long-term survival (male gender, Charlson Comorbidity Index, Glasgow Prognostic Score and P-stage) should be taken into account for the effective management of patients older than 80 years with lung cancer, undergoing surgery.

**Keywords:** Octogenarian • Multi-institutional analysis • Lung cancer surgery • Prognostic marker

### INTRODUCTION

The number of elderly lung cancer patients, including octogenarians, has been increasing recently [1, 2]. According to the retrospective analyses for lung cancer surgery in octogenarians, the morbidity and the mortality rates were 8.4–48.0% and 1.1–8.8%, respectively; the 5-year overall survival rate was 27.0–57.5% [3–8]. Although these results are relatively acceptable, data regarding lung cancer are limited, and the surgical results and the risk evaluation

in large elderly cohorts, particularly in octogenarians, were unclear. Apart from cancer staging, several useful prognostic scores that could predict long-term survival were reported. The Charlson Comorbidity Index (CCI) that was formulated in 1987 stipulates that 19 comorbidities have a significant effect on survival in breast cancer patients and has also been applied to primary lung cancer patients [9–11]. The more recent Glasgow Prognostic Score (GPS) that was first reported in 2001 stipulates that systemic inflammatory response predicted survival time of cancer patients, including lung cancer patients [12–14]. However, few studies for both CCI and GPS in an elderly cohort have been conducted. Therefore, this study

<sup>†</sup>Presented at the 25th European Conference on General Thoracic Surgery, Innsbruck, Austria, 28–31 May 2017.

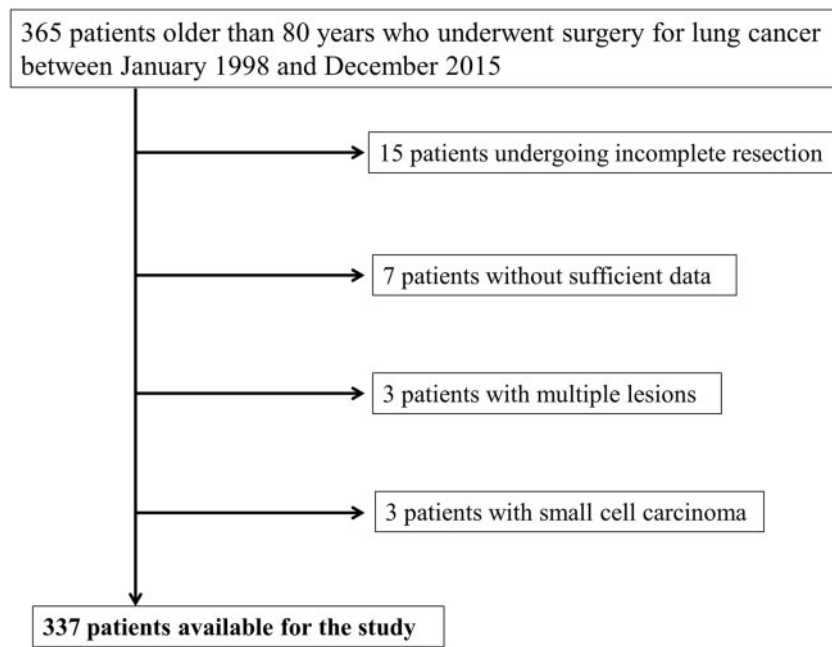

Figure 1: Flow chart of the number of patients eligible for this study.

aimed to analyse the surgical results and elucidate the risk factors for postoperative complication and the long-term predictive values for lung cancer patients in octogenarians undergoing radical surgery in Japanese multi-institutional cohorts.

## MATERIALS AND METHODS

This study included lung cancer patients aged 80 years or older who underwent surgery at any of the 7 institutions from January 1998 through December 2015. Clinical characteristics, including age, gender, preoperative comorbidity, preoperative blood test results [C-reactive protein (CRP) and albumin levels], respiratory function, tumour histology, clinical and pathological stage (C-stage and P-stage), operative procedure, operative time, postoperative complication, survival time and cause of death, were retrospectively collected from the databases of each institute. The preoperative examination for cancer staging included computed tomography of the chest and upper abdomen, computed tomography or magnetic resonance imaging of the brain and bone scintigraphy or  $^{18}\text{F}$ -fluorodeoxyglucose-positron emission tomography. Although endobronchial ultrasonography was performed in selected cases, mediastinoscopy was not performed in 7 institutes. The tumour stage was determined according to the seventh edition of the tumour, node and metastasis (TNM) staging system of the International Union for Cancer Control; the histological tumour type was determined according to the third edition of the World Health Organization (WHO) classification [15, 16]. Operative indication was determined based on the following factors decided on by the surgeons of each institute: performance status, 0–1; postoperative predicted forced expiratory volume in 1 s,  $\geq 800$  ml [17]; clinical Stage, I–IIIA expected to be completely resectable; and mental status, not senile. Limited lung resection, defined as partial resection in this study, was selected if the patient had lower pulmonary function or multicomorbidities. Video-assisted thoracic surgery was treatment option, but if a patient was contraindicated for video-assisted thoracic surgery, open thoracotomy was used. Contraindications for

video-assisted thoracic surgery included pulmonary artery or bronchial plasty, chest wall resection or the presence of giant tumour. The CCI was scored according to 19 preoperative comorbidities; this method was consistent with that of Charlson *et al.* [9]. The GPS was defined as follows: score 0, albumin level  $\geq 3.5$  g/dl and CRP level  $< 0.5$  mg/dl; score 1, albumin level  $< 3.5$  g/dl or CRP level  $\geq 0.5$  mg/dl and score 2, albumin level  $< 3.5$  g/dl and CRP  $\geq 0.5$  mg/dl. This was similar to that of by McMillan *et al.* [12]. The National Clinical Database (NCD) in Japan defined postoperative pulmonary complication as follows: pulmonary fistula is prolonged air leakage over 7 postoperative days or the need for reoperation or pleurodesis. Postoperative pneumonia is the new infiltration on chest roentgenogram (X-P) or computed tomography, which needed antibiotics therapy. Respiratory failure was defined as management with a ventilator over 2 postoperative days or the need for reintubation or tracheotomy. The overall survival time was calculated from the date of surgery to the time of death or the last follow-up. The Research Review Board at The University of Tokyo Graduate School of Medicine (approval number 11146) and the respective ethics committees of the other 6 institutions approved this study. Statistical analysis was performed using JMP 12.0 pro (SAS institute Inc., Cary, NC, USA). The unpaired *t*-test was used for continuous variables. The Spearman's correlation analysis was used to assess the covariant of 2 variables. The risk factors for postoperative complications were assessed using univariate and multivariate logistic regression analyses. P-stage was analysed as a categorical variable. Survival curves were calculated via the Kaplan–Meier method; differences in survival were assessed using the log-rank test. Univariate and multivariate analyses for long-term survival were calculated via the Cox proportional hazard model. A *P*-value  $< 0.05$  was considered statistically significant.

## RESULTS

A total of 365 patients aged 80 years or older who underwent surgery for lung cancer were initially enrolled, but 28 were excluded due to incomplete resection [15], insufficient data [7],

**Table 1:** Clinical characteristics of the 337 octogenarian lung cancer patients who underwent radical surgery

| Clinical characteristics                                                                                                 |                         |
|--------------------------------------------------------------------------------------------------------------------------|-------------------------|
| Male/female                                                                                                              | 216/121                 |
| Age (years)                                                                                                              | 80–92 (median 82)       |
| Body mass index                                                                                                          | 15.1–31.8 (mean 22.5)   |
| Brinkman index 0/<200/<600/<br>≥600/unknown                                                                              | 120/12/41/158/6         |
| %VC (%)                                                                                                                  | 50.5–162.6 (mean 99.7)  |
| FEV <sub>1</sub> /FVC (%)                                                                                                | 31.0–98.7 (mean 69.0)   |
| Preoperative comorbidity (yes), n (%)                                                                                    | 207 (61.4)              |
| Clinical tumour size (cm)                                                                                                | 0.8–9.4 (mean 2.9)      |
| Clinical lymph node stage (N0/N1/N2)                                                                                     | 299/24/14               |
| Clinical stage (IA/IB/IIA/IIIB/IIIA)                                                                                     | 191/86/31/14/15         |
| Procedure, n (%)                                                                                                         |                         |
| Partial resection                                                                                                        | 66 (19.6)               |
| Segmentectomy                                                                                                            | 28 (8.3)                |
| Lobectomy                                                                                                                | 237 (70.3)              |
| Bilobectomy                                                                                                              | 5 (1.5)                 |
| Pneumonectomy                                                                                                            | 1 (0.3)                 |
| Surgical approach, n (%)                                                                                                 |                         |
| Thoracotomy                                                                                                              | 78 (23.1)               |
| Hybrid VATS                                                                                                              | 97 (28.8)               |
| VATS                                                                                                                     | 146 (43.3)              |
| Conversion to thoracotomy                                                                                                | 16 (4.7)                |
| Era change for surgical procedure<br>of VATS, n (%)                                                                      |                         |
| 1998–2005                                                                                                                | 19/46 (41.3)            |
| 2006–2015                                                                                                                | 224/291 (77.0)          |
| Lymph node dissection, n (%)                                                                                             |                         |
| ND0                                                                                                                      | 82 (24.3)               |
| ND1                                                                                                                      | 105 (31.2)              |
| ND2                                                                                                                      | 145 (43.0)              |
| Unknown, others, n (%)                                                                                                   | 5 (1.5)                 |
| Operation time (min)                                                                                                     | 37–604 (mean 211.8)     |
| Bleeding (ml)                                                                                                            | 0–4338 (mean 218.7)     |
| Pathological tumour size (cm)                                                                                            | 0.6–11.0 (mean 3.1)     |
| Pathological lymph node stage<br>(N0/N1/N2/Nx)                                                                           | 216/28/27/66            |
| Pathological stage (IA/IB/IIA/IIIB/IIIA)                                                                                 | 191/86/31/14/38         |
| Histology (Ad/Sq/others)                                                                                                 | 217/90/30               |
| Drainage time (days)                                                                                                     | 1–26 (median 4)         |
| Postoperative stay (days)                                                                                                | 3–391 (median 11)       |
| Postoperative adjuvant therapy for<br>pathological stage IIIA (none/<br>chemotherapy/radiotherapy/<br>chemoradiotherapy) | 30/5/2/1                |
| Observation time (months)                                                                                                | 0.1–152.8 (median 29.9) |

Ad: adenocarcinoma; FEV<sub>1</sub>: forced expiratory volume in 1 s; FVC: forced vital capacity; VATS: video-assisted thoracoscopic surgery; ND: lymph node dissection; ND0: without any lymph node dissection; ND1: hilar lymph node dissection; ND2: hilar and mediastinal lymph node dissection; Sq: squamous cell carcinoma; VC: vital capacity.

multiple lesions [3] and diagnosis of small-cell carcinoma [3]. Finally, 337 patients were included for analysis (Fig. 1). The clinical characteristics of these patients are presented in Table 1. Preoperative comorbidity was noted in 205 (60.8%) patients; 237 (70.3%) patients underwent radical lobectomy, and mediastinal lymph node dissection was performed in 145 (43.0%) patients. The prevalence of the comorbidity in accordance with the CCI score and the GPS is described in Table 2. The most common comorbidity was malignant disease within 5 years (86 cases, 25.5%). A total of 119 (35.3%) patients developed postoperative complications, whereas 6 (1.8%) patients died due to

**Table 2:** Prevalence of comorbidity scored via the CCI and the GPS

| Score | Comorbidity                          | n (%)      | Total score<br>of CCI | n (%)      |
|-------|--------------------------------------|------------|-----------------------|------------|
| 1     | Coronary artery disease              | 44 (13.1)  | 0                     | 132 (39.2) |
| 1     | Congested heart failure              | 3 (0.9)    | 1                     | 68 (20.2)  |
| 1     | Peripheral vascular disease          | 8 (2.4)    | 2                     | 87 (25.8)  |
| 1     | Cerebrovascular disease              | 24 (7.1)   | 3                     | 40 (11.9)  |
| 1     | Dementia                             | 3 (0.9)    | 4                     | 6 (1.8)    |
| 1     | Chronic pulmonary disease            | 24 (7.1)   | 5                     | 2 (0.6)    |
| 1     | Connective tissue disease            | 15 (4.5)   | 6                     | 1 (0.3)    |
| 1     | Peptic ulcer disease                 | 33 (9.8)   | 7                     | 0 (0)      |
| 1     | Mild liver disease                   | 0 (0)      | 8                     | 1 (0.3)    |
| 1     | Diabetes                             | 45 (13.4)  | Total                 | 337 (100)  |
| 2     | Hemiplegia                           | 2 (0.6)    |                       |            |
| 2     | Moderate-to-severe renal disease     | 1 (0.3)    |                       |            |
| 2     | Diabetes with organ damage           | 5 (1.5)    |                       |            |
| 2     | Any prior tumour (within 5 years)    | 86 (25.5)  |                       |            |
| 2     | Leukaemia                            | 0 (0)      |                       |            |
| 2     | Lymphoma                             | 1 (0.3)    |                       |            |
| 3     | Moderate-to-severe liver disease     | 0 (0)      |                       |            |
| 6     | Metastatic solid tumour              | 2 (0.6)    |                       |            |
| 6     | AIDS                                 | 0 (0)      |                       |            |
| Score | Preoperative state                   | n (%)      | Total score<br>of GPS | n (%)      |
| 0     | Albumin ≥3.5 g/dl and CRP <0.5 mg/dl | 240 (71.2) | 0                     | 240 (71.2) |
| 1     | Albumin <3.5 g/dl and CRP <0.5 mg/dl | 11 (3.3)   | 1                     |            |
| 1     | Albumin ≥3.5 g/dl and CRP ≥0.5 mg/dl | 49 (14.5)  | 1                     | 60 (17.8)  |
| 2     | Albumin <3.5 g/dl and CRP ≥0.5 mg/dl | 20 (5.9)   | 2                     | 20 (5.9)   |
|       | Unknown                              | 17 (5.0)   | Unknown               | 17 (5.0)   |
|       |                                      |            | Total                 | 337 (100)  |

AIDS: acquired immune deficiency syndrome; CCI: Charlson Comorbidity Index; CRP: C-reactive protein; GPS: Glasgow Prognostic Score.

surgery-related causes (Table 3). Thirty-day mortality was observed in 4 patients, whereas 90-day mortality was observed in only 1 patient. According to the univariate and multivariate logistic regression analyses, male gender (odds ratio 2.18,  $P=0.01$ ) and operation time (odds ratio 5.89,  $P=0.047$ ) were independent significant risk factors for postoperative complications (Table 4). The results of Cox proportional hazards model of the univariate and multivariate analyses for long-term survival are presented in Table 5. P-stage [P-stage III: hazard ratio (HR) 4.07,  $P<0.001$ ], male gender (HR 2.09,  $P=0.01$ ), CCI ≥2 (HR 2.25,  $P=0.03$ ) and GPS = 1/2 (HR 2.12,  $P=0.04$ ) were significant risk factors for poor overall survival. The 5-year overall and recurrence-free survival rates of all 337 patients were 66.1% [95% confidence interval (CI) 59.5–72.1%] and 60.3% (95% CI 53.8–66.4%), respectively. The Kaplan–Meier curves stratified based on gender, CCI, GPS and P-stage are shown in Fig. 2A–D, respectively. The 5-year overall survival rates were 57.7% (95% CI



**Table 4:** Univariate and multivariate logistic regression analyses of variables associated with postoperative minor and major complications

| Variables                               | Complicated group<br>(119 cases) | Non-complicated<br>group (218 cases) | Univariate analysis          |         | Multivariate analysis  |         |
|-----------------------------------------|----------------------------------|--------------------------------------|------------------------------|---------|------------------------|---------|
|                                         |                                  |                                      | Odds ratio (95% CI)          | P-value | Odds ratio<br>(95% CI) | P-value |
| Age (years)                             | 80–92 (mean 82.5)                | 80–91 (mean 82.2)                    | 1.06 (0.96–1.17)             | 0.28    |                        |         |
| Gender (male/female)                    | 92/27                            | 124/94                               | 2.58 (1.57–4.34)             | <0.001  | 2.06 (1.13–3.84)       | 0.02*   |
| BI ( $\geq 600$ / $< 600$ )             | 68/49                            | 90/124                               | 1.91 (1.21–3.03)             | 0.005   | 1.27 (0.70–2.29)       | 0.42    |
| Body mass index                         | 17.1–30.1 (mean 22.5)            | 15.1–31.8 (mean 22.5)                | 1.00 (0.93–1.07)             | 0.92    |                        |         |
| %VC                                     | 50.5–144.4 (mean 96.6)           | 57.0–162.6 (mean 101.4)              | 0.98 (0.97–0.997)            | 0.02    | 0.99 (0.97–1.00)       | 0.15    |
| FEV <sub>1</sub> /FVC                   | 38.0–97.7 (mean 69.6)            | 31–98.7 (mean 68.6)                  | 1.00 (0.99–1.03)             | 0.50    |                        |         |
| Coronary artery disease (yes/no)        | 12/107                           | 33/185                               | 0.63 (0.30–1.24)             | 0.18    |                        |         |
| Diabetes mellitus (yes/no)              | 17/102                           | 28/190                               | 1.13 (0.58–2.15)             | 0.71    |                        |         |
| Comorbidity (yes/no)                    | 81/38                            | 124/94                               | 1.62 (1.02–2.60)             | 0.04    | 1.21 (0.72–2.04)       | 0.48    |
| GPS (1 or 2/0)                          | 29/83                            | 51/156                               | 1.08 (0.63–1.81)             | 0.78    |                        |         |
| CCI ( $\geq 2/0$ or 1)                  | 68/51                            | 86/132                               | 1.15 (0.73–1.81)             | 0.54    |                        |         |
| Procedure (radical/limited)             | 113/16                           | 168/50                               | 1.92 (1.06–3.63)             | 0.03    | 1.46 (0.70–3.11)       | 0.31    |
| Surgical approach<br>(VATS/thoracotomy) | 85/34                            | 158/60                               | 1.05 (0.63–1.72)             | 0.84    |                        |         |
| LN dissection (ND2/ND0 or ND1)          | 54/63                            | 91/124                               | 1.16 (0.74–1.84)             | 0.50    |                        |         |
| Operative time (min)                    | 52–551 (mean 232.5)              | 37–604 (mean 200.0)                  | 9.53 (2.28–42.42)            | 0.002   | 5.89 (1.04–35.94)      | 0.047*  |
| Haemorrhage (mL)                        | 0–4030 (mean 278.8)              | 0–4338 (mean 183.9)                  | 1.00 (0.99–1.00)             | 0.07    |                        |         |
| Pathology (non-Ad/Ad)                   | 49/70                            | 66/152                               | 1.61 (1.01–2.57)             | 0.04    | 1.16 (0.67–1.99)       | 0.60    |
| P-stage (I/II/III)                      | 74/31/14                         | 165/29/24                            | P-Stage I 1                  |         |                        |         |
|                                         |                                  |                                      | P-Stage II 2.38 (1.34–4.26)  | 0.003   |                        |         |
|                                         |                                  |                                      | P-Stage III 1.30 (0.62–2.63) | 0.47    |                        |         |

Ad: Adenocarcinoma; BI: Brinkman index; CCI: Charlson Comorbidity Index; CI: confidence interval; FEV<sub>1</sub>: forced expiratory volume in 1 s; FVC: forced vital capacity; GPS: Glasgow Prognostic Score; limited: limited lung resection; LN: lymph node; ND: lymph node dissection; ND0: without any lymph node dissection; ND1: hilar lymph node dissection; ND2: hilar and mediastinal lymph node dissection; P-stage: pathological stage; radical: radical lung resection; VATS: video-assisted thoracoscopic surgery; VC: vital capacity.

**Table 5:** Univariate and multivariate analyses with Cox proportional hazards model for overall survival in 337 lung cancer octogenarians who underwent surgery

|                                      | Univariate analysis          |         | Multivariate analysis |         |
|--------------------------------------|------------------------------|---------|-----------------------|---------|
|                                      | HR (95% CI)                  | P-value | HR (95% CI)           | P-value |
| Age (years)                          | 1.00 (0.91–1.10)             | 0.95    |                       |         |
| Gender (male/female)                 | 2.40 (1.52–3.94)             | <0.001  | 2.22 (1.21–4.21)      | 0.01*   |
| BI ( $\geq 600$ / $< 600$ )          | 2.12 (1.41–3.22)             | <0.001  | 1.51 (0.87–2.66)      | 0.14    |
| Body mass index                      | 0.96 (0.90–1.03)             | 0.25    |                       |         |
| %VC                                  | 0.99 (0.97–0.99)             | 0.01    | 0.99 (0.98–1.01)      | 0.38    |
| FEV <sub>1</sub> /FVC                | 1.00 (0.98–1.01)             | 0.72    |                       |         |
| GPS (1 or 2/0)                       | 2.16 (1.38–3.33)             | 0.001   | 1.82 (1.04–3.11)      | 0.04*   |
| CCI ( $\geq 2/0$ or 1)               | 1.88 (1.09–3.30)             | 0.02    | 1.70 (1.09–2.68)      | 0.02*   |
| Procedure (limited/radical)          | 1.16 (0.70–1.84)             | 0.55    |                       |         |
| LN dissection (ND2/ND0 or ND1)       | 0.78 (0.52–1.16)             | 0.23    |                       |         |
| Surgical approach (VATS/thoracotomy) | 0.66 (0.45–0.99)             | 0.046   | 0.84 (0.53–1.37)      | 0.48    |
| Postoperative complication (yes/no)  | 1.19 (0.79–1.78)             | 0.40    |                       |         |
| Pathology (non-Ad/Ad)                | 1.62 (1.08–2.41)             | 0.02    | 0.76 (0.44–1.30)      | 0.32    |
| P-stage (I, II, III)                 | P-Stage I 1                  |         | 1                     |         |
|                                      | P-Stage II 2.11 (1.29–3.37)  | 0.004   | 1.59 (0.88–2.75)      | 0.12    |
|                                      | P-Stage III 2.49 (1.44–4.11) | 0.002   | 4.06 (2.12–7.42)      | <0.001* |

Ad: adenocarcinoma; BI: Brinkman index; CCI: Charlson Comorbidity Index; CI: confidence interval; FEV<sub>1</sub>: forced expiratory volume in 1 s; FVC: forced vital capacity; GPS: Glasgow Prognostic Score; HR: hazard ratio; limited: limited lung resection; ND: lymph node dissection; ND0: without any lymph node dissection; ND1: hilar lymph node dissection; ND2: hilar and mediastinal lymph node dissection; P-stage: pathological stage; radical: radical lung resection; VATS: video-assisted thoracoscopic surgery; VC: vital capacity.

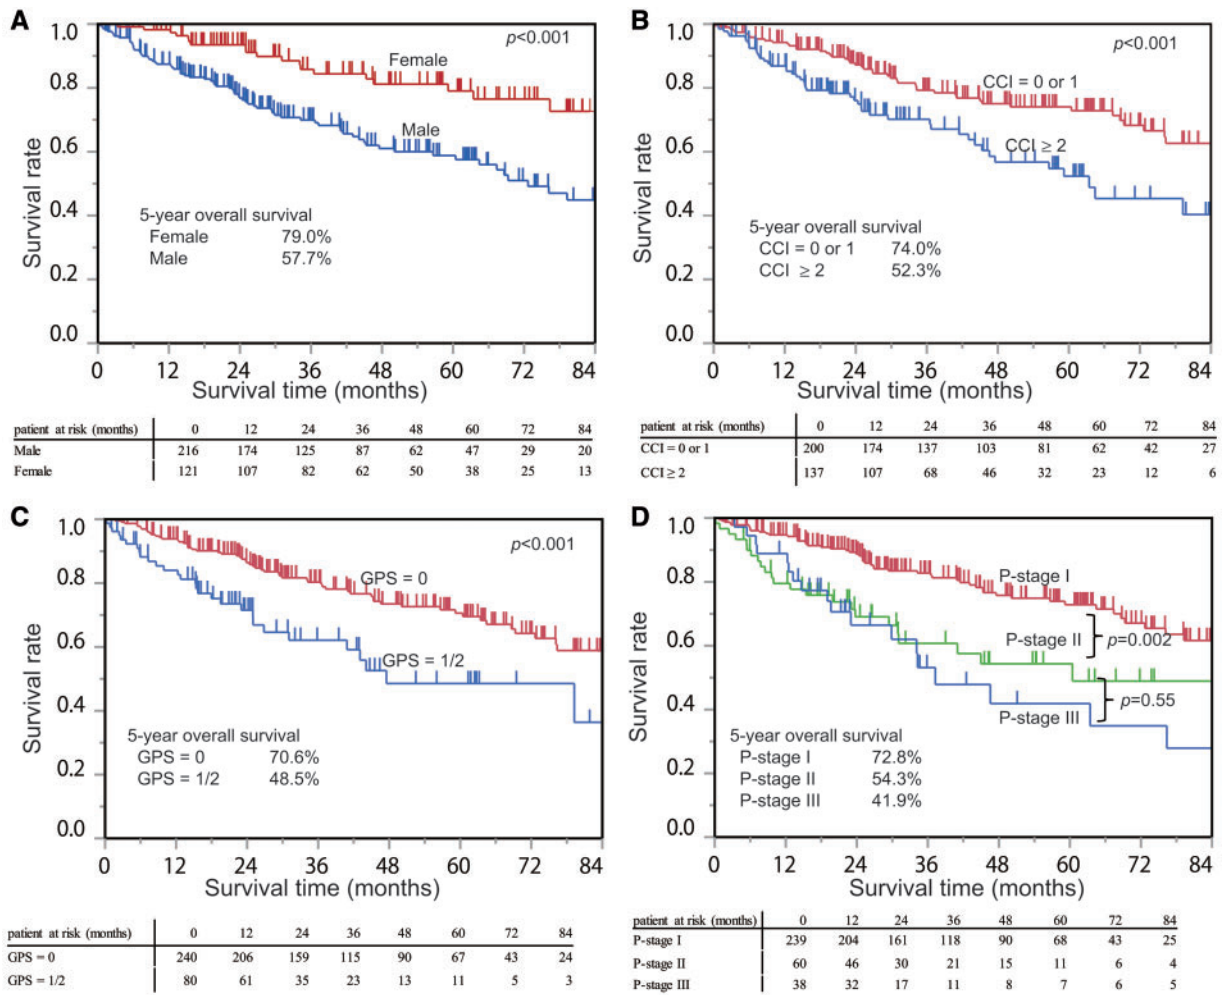

**Figure 2:** Comparisons of overall survival curves between (A) male and female, (B) CCI = 0 or 1 and CCI ≥ 2, (C) GPS = 0 and 1/2 and (D) P-stage I, II and III patients. CCI: Charlson Comorbidity Index; GPS: Glasgow Prognostic Score; P-stage; pathological stage.

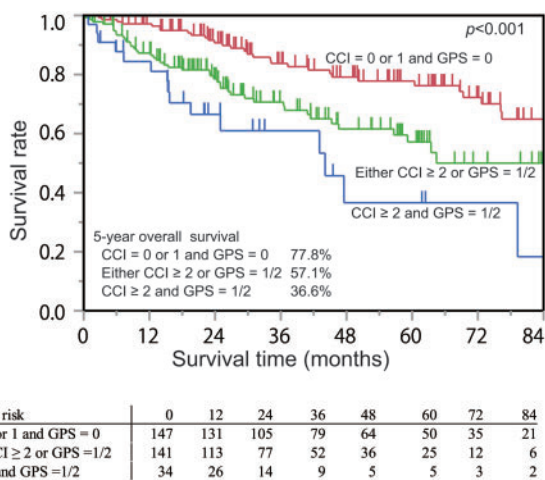

**Figure 3:** Comparison of overall survival curves between patients with a CCI = 0 or 1 and GPS = 0, either CCI ≥ 2 or GPS = 1/2 and CCI ≥ 2 and GPS = 1/2. CCI: Charlson Comorbidity Index; GPS: Glasgow Prognostic Score.

patients who underwent surgeries [3]. In this study, we initially showed that both the CCI and the GPS can be used to predict overall survival as well as P-stage and male gender. According to the results of recurrence-free and disease-specific survival times

for CCI and GPS (Supplementary Material, Fig. S1) in our study, both the CCI and the GPS had some correlation with cancer-related deaths. There could be a possibility that the results are obscured due to some irregular non-cancer-related death. A previous study of a limited number of octogenarian lung cancer patients showed that CCI predicted overall survival in patients with non-small-cell lung cancer [26]. The CCI thus proved to be a reliable predictive marker.

The GPS was also useful in predicting the survival of various cancer patients from previous analysis [12]. The modified GPS correlated with the Edmonton Frailty Scale and clinical cancer staging in 52 solid tumour patients aged 65 years or older at diagnosis [27]. The GPS and P-stage were significant prognostic factors in 98 patients aged 80 years and older who have clinical Stage I lung cancer [28]. Hence, the CCI and the GPS should be determined when considering the operative indication and the type of procedure for elderly lung cancer patients.

### Limitations

This study has several limitations, including selection bias, because of its retrospective and multi-institutional design, and because no comparative analysis was performed between patients older than 80 years and those younger than 80 years. In

particular, almost 40% of patients had no comorbidities, because Japanese people generally live longer than those in other countries do; the average lifespan is 79 years for men and 86 years for women. Patients in their 80s with good performance status are also increasing in this country. According to the annual report in Japan, the proportion of lung cancer surgery in patients over the age of 80 years increased from 8.7%, in 2007, to 12.1%, in 2014 [2]. This could be suggestive of a patient selection bias. However, data were collected from a large number of Stage I–IIIA lung cancer patients aged 80 years or older who underwent surgery, and both the short- and long-term results were analysed.

## CONCLUSIONS

We concluded that the risk factors for postoperative morbidity were male gender and operation time and that the predictive factors for long-term survival were male gender, CCI, GPS and P-stage in this single-arm retrospective analysis, which we should keep in mind for lung cancer surgery in the elderly. In addition, the Japanese Association for Chest Surgery is currently conducting an ongoing prospective multi-institutional study, comparing patients older than 80 years with lung cancer with those younger than 80 years. We expect the results of this study to support the findings of our research.

## SUPPLEMENTARY MATERIAL

Supplementary material is available at *EJCTS* online.

## ACKNOWLEDGEMENTS

We are very grateful to Kosuke Kashiwabara from the Department of Biostatistics, School of Public Health, Graduate School of Medicine, The University of Tokyo, Tokyo, Japan, for assisting with the statistical analysis.

**Conflict of interest:** none declared.

## REFERENCES

- Ministry of Health, Labour and Welfare. Vital Statistics Japan. 2017. <http://www.mhlw.go.jp/english/database/db-hw/dl/81-1a2en.pdf> (4 July 2017, date last accessed).
- Committee for Scientific Affairs, The Japanese Association for Thoracic Surgery, Masuda M, Okumura M, Doki Y, Endo S, Hirata Y *et al.* Thoracic and cardiovascular surgery in Japan during 2014: annual report by The Japanese Association for Thoracic Surgery. *Gen Thorac Cardiovasc Surg* 2016;64:665–97.
- Dominguez-Ventura A, Allen MS, Cassivi SD, Nichols FC 3rd, Deschamps C, Pairolero PC. Lung cancer in octogenarians: factors affecting morbidity and mortality after pulmonary resection. *Ann Thorac Surg* 2006;82:1175–9.
- Okami J, Higashiyama M, Asamura H, Goya T, Koshiishi Y, Sohara Y *et al.* Pulmonary resection in patients aged 80 years or over with clinical stage I non-small cell lung cancer: prognostic factors for overall survival and risk factors for postoperative complications. *J Thorac Oncol* 2009;4:1247–53.
- Fanucchi O, Ambrogi MC, Dini P, Lucchi M, Melfi F, Davini F *et al.* Surgical treatment of non-small cell lung cancer in octogenarians. *Interact CardioVasc Thorac Surg* 2011;12:749–53.
- Hino H, Murakawa T, Ichinose J, Nagayama K, Nitadori J, Anraku M *et al.* Results of lung cancer surgery for octogenarians. *Ann Thorac Cardiovasc Surg* 2015;21:209–16.
- Dominguez-Ventura A, Cassivi SD, Allen MS, Wigle DA, Nichols FC, Pairolero PC *et al.* Lung cancer in octogenarians: factors affecting long-term survival following resection. *Eur J Cardiothorac Surg* 2007;32:370–4.
- Brock MV, Kim MP, Hooker CM, Alberg AJ, Jordan MM, Roig CM *et al.* Pulmonary resection in octogenarians with stage I non-small cell lung cancer: a 22-year experience. *Ann Thorac Surg* 2004;77:271–7.
- Charlson ME, Pompei P, Ales KL, MacKenzie CR. A new method of classifying prognostic comorbidity in longitudinal studies: development and validation. *J Chronic Dis* 1987;40:373–83.
- Birim O, Kappetein AP, Bogers AJ. Charlson comorbidity index as a predictor of long-term outcome after surgery for non-small cell lung cancer. *Eur J Cardiothorac Surg* 2005;28:759–62.
- Moro-Sibilot D, Aubert A, Diab S, Lantuejoul S, Fournier P, Brambilla E *et al.* Comorbidities and Charlson score in resected stage I non-small cell lung cancer. *Eur Respir J* 2005;26:480–6.
- McMillan DC, Elahi MM, Sattar N, Angerson WJ, Johnstone J, McArdle CS. Measurement of the systemic inflammatory response predicts cancer-specific and non-cancer survival in patients with cancer. *Nutr Cancer* 2001;41:64–9.
- Yotsukura M, Ohtsuka T, Kasada K, Kamiyama I, Hayashi Y, Asamura H. Value of the Glasgow prognostic score as a prognostic factor in resectable non-small cell lung cancer. *J Thorac Oncol* 2016;11:1311.
- Kawashima M, Murakawa T, Shinozaki T, Ichinose J, Hino H, Konoeda C *et al.* Significance of the Glasgow Prognostic Score as a prognostic indicator for lung cancer surgery. *Interact CardioVasc Thorac Surg* 2015;21:637–43.
- Sobin LH, Gospodarowicz MK, Wittekind C. Lung and pleural tumours. In: Sobin LH, Gospodarowicz MK, Wittekind C (eds). *UICC International Union Against Cancer. TNM Classification of Malignant Tumours*, 7th edn. Oxford: Wiley-Blackwell, 2009, 138–46.
- Travis WD, Brambilla E, Müller-Hermelink HK, Harris CC. Pathology and genetics of tumours of the lung, pleura, thymus and heart. In: Travis WD, Brambilla E, Müller-Hermelink HK, Harris CC (eds). *World Health Organization Classification of Tumours*. Lyon: IARC Press, 2004, 9–124.
- Sawabata N, Miyaoka E, Asamura H, Nakanishi Y, Eguchi K, Mori M *et al.* Japanese lung cancer registry study of 11, 663 surgical cases in 2004: demographic and prognosis changes over decade. *J Thorac Oncol* 2011;6:1229–35.
- Kanzaki R, Inoue M, Minami M, Shintani Y, Funaki S, Kawamura T *et al.* Outcomes of lung cancer surgery in patients with coronary artery disease: a decade of experience at a single institution. *Surg Today* 2017;47:27–34.
- Sekine Y, Behnia M, Fujisawa T. Impact of COPD on pulmonary complications and on long-term survival of patients undergoing surgery for NSCLC. *Lung Cancer* 2002;37:95–101.
- Birim O, Maat AP, Kappetein AP, van Meerbeeck JP, Damhuis RA, Bogers AJ. Validation of the Charlson comorbidity index in patients with operated primary non-small cell lung cancer. *Eur J Cardiothorac Surg* 2003;23:30–4.
- Birim O, Zuydendorp HM, Maat AP, Kappetein AP, Eijkemans MJ, Bogers AJ. Lung resection for non-small-cell lung cancer in patients older than 70: mortality, morbidity, and late survival compared with the general population. *Ann Thorac Surg* 2003;76:1796–801.
- Nakanishi R, Yamashita T, Oka S. Video-assisted thoracic surgery lobectomy for non-small cell lung cancer in patients with a Charlson comorbidity index score of two or more. *J Thorac Oncol* 2010;5:56–61.
- Rivera C, Falcoz PE, Rami-Porta R, Velly JF, Begueret H, Roques X *et al.* Mediastinal lymphadenectomy in elderly patients with non-small-cell lung cancer. *Eur J Cardiothorac Surg* 2013;44:88–92.
- Mizuguchi S, Inoue K, Iwata T, Izumi N, Tsukioka T, Morita R *et al.* Impact of mediastinal lymph node dissection on octogenarians with non-small cell lung cancer. *Jpn J Thorac Cardiovasc Surg* 2006;54:103–8.
- Miyazaki T, Yamazaki T, Nakamura D, Sato S, Yamasaki N, Tsuchiya T *et al.* Surgery or stereotactic body radiotherapy for elderly stage I lung cancer? A propensity score matching analysis. *Surg Today* 2017; doi:10.1007/s00595-017-1536-4.
- Miura N, Kohno M, Ito K, Senba M, Kajiwara K, Hamaguchi N *et al.* Lung cancer surgery in patients aged 80 years or older: an analysis of risk factors, morbidity, and mortality. *Gen Thorac Cardiovasc Surg* 2015;63:401–5.
- Leardini V, Truffelli DC, da Silva FB, Normando SR, Camargo EW, Matos LL *et al.* Applicability of modified Glasgow Prognostic Score in the assessment of elderly patients with cancer: a pilot study. *J Geriatr Oncol* 2015;6:479–83.
- Miyazaki T, Yamasaki N, Tsuchiya T, Matsumoto K, Kunizaki M, Kamohara R *et al.* Ratio of C-reactive protein to albumin is a prognostic factor for operable non-small-cell lung cancer in elderly patients. *Surg Today* 2017;47:836–43.
